# Supplementary material for: Effective tumor-targeted delivery of etoposide using chitosan nanoparticles conjugated with folic acid and sulfobetaine methacrylate
Source: Royal Society of Chemistry journal article supplement (doi:10.1039/c6ra14104h), 2016-01-01
Supplement: c6ra14104h1.pdf [file c6ra14104h1.pdf]

Supplementary Figures

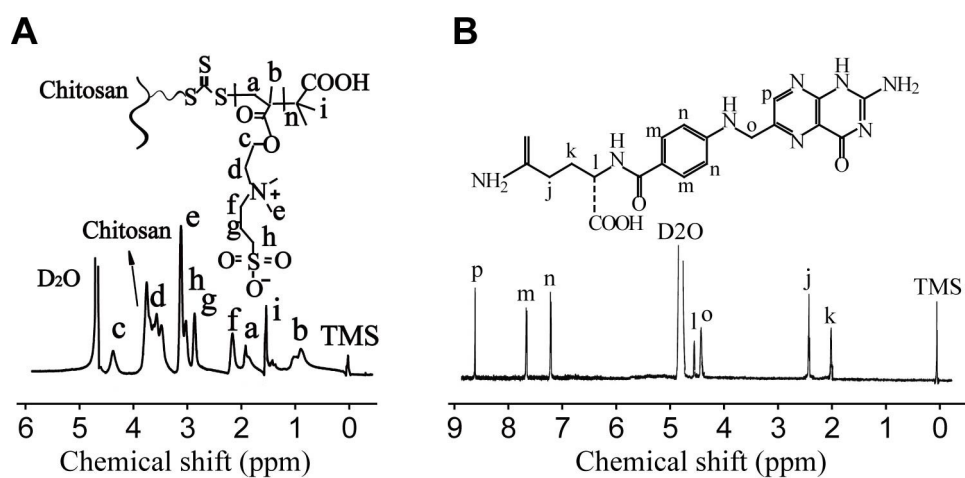

Fig. S1 <sup>1</sup>H NMR spectrum (400 M, CF<sub>3</sub>COOD/D<sub>2</sub>O (v/v = 1/9)) of CS-g-PSBMA and FA.

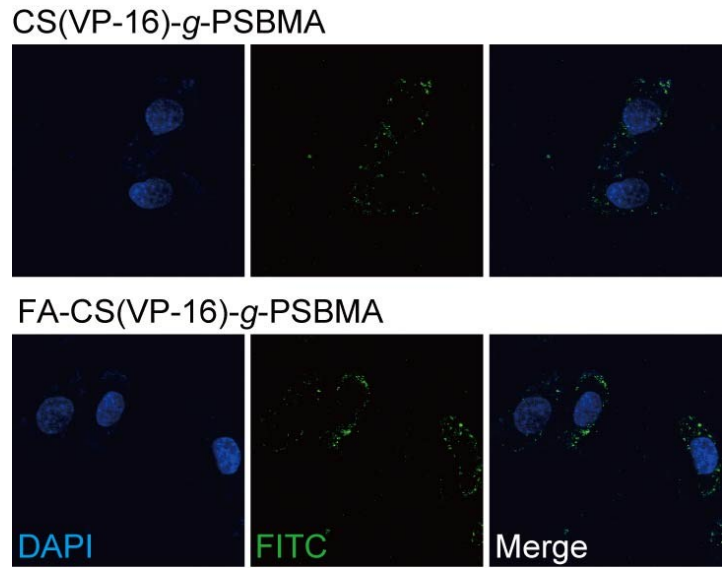

Fig. S2 Cellular uptake of FITC-labelled CS(VP-16)-*g*-PSBMA and FA-CS(VP-16)-*g*-PSBMA nanoparticles in FR-negative L929 cells. L929 cells were incubated with nanoparticles for 8 h. After stained with DAPI for 5 min, cell images were obtained by confocal laser scanning microscope.
